# Supplementary material
Source: publisher figshare collection journal article supplement (https://gsajournals.figshare.com/ndownloader/files/24562655)
Supplement: Supplementary file 1 [file 24562655]

## Sheet: Sheet1
Table S5. Gene IDs of ANTP genes in Hydra viridissima A99
Class	Familiy	H.viridissima ID
ANTP	Barx	scaffold534.g8.t1
ANTP	Cdx
ANTP	Dbx
ANTP	Dlx	scaffold18.g183.t1
ANTP	Emx
ANTP	Evx
ANTP	Gbx
ANTP	Gsx	scaffold1.g190.t1
ANTP	Hhex	scaffold12.g181.t1
ANTP	Hlx
ANTP	Hox1	scaffold145.g31.t1
ANTP	Hox2
ANTP	Hox9-13	scaffold12.g23.t1	scaffold2251.g1.t1
ANTP	Lbx
ANTP	Meox	scaffold80.g34.t1
ANTP	Mnx
ANTP	Msx	scaffold44.g104.t1
ANTP	Msxlx
ANTP	Nedx
ANTP	Nk1	scaffold57.g68.t1
ANTP	Nk2.1/2.2/4	scaffold71.g30.t1	scaffold153.g22.t1
ANTP	Nk3
ANTP	Nk5/Hmx
ANTP	Nk6
ANTP	Nk7
ANTP	Noto	scaffold5.g268.t1
ANTP	Ro
ANTP	Tlx
ANTP	Xlox/Pdx
CERS	Cers	scaffold107.g32.t1	scaffold23.g95.t1
CUT	Onecut
HNF	Hnf1
LIM	Isl
LIM	Lhx1/5	scaffold19.g44.t1
LIM	Lhx2/9
LIM	Lhx6/8	scaffold77.g74.t1
LIM	Lmx	scaffold105.g48.t1
POU	Hdx
POU	Pou1
POU	Pou3
POU	Pou4	scaffold9.g67.t1
POU	Pou6	scaffold145.g35.t1
PRD	Alx
PRD	Arx	scaffold2051.g38.t1
PRD	Dmbx	scaffold51.g50.t1
PRD	Gsc	scaffold52.g112.t1
PRD	Hbn	scaffold160.g7.t1
PRD	Otp	scaffold70.g84.t1	scaffold70.g85.t1
PRD	Otx	scaffold94.g19.t1	scaffold94.g48.t1	scaffold104.g20.t1
PRD	Pax3/7
PRD	Pax4/6	scaffold579.g2.t1
PRD	Pitx	scaffold2051.g7.t1
PRD	Prrx
PRD	Rax
PRD	Repo
PRD	Uncx	scaffold10.g98.t1
PRD	Vsx	scaffold61.g71.t1	scaffold1857.g1.t1
SINE	Six1/2	scaffold560.g13.t1
SINE	Six3/6	scaffold52.g55.t1
SINE	Six4/5
TALE	Irx	scaffold184.g7.t1
TALE	Meis	scaffold26.g17.t1
TALE	Pbx	scaffold1.g90.t1
TALE	Pknox	scaffold175.g15.t1
TALE	Tgif
